# Supplementary material for: Ultrahigh energy storage density in lead-free Bi 0.5 Na 0.5 TiO 3 -based relaxor ferroelectric ceramics under moderate electric fields via phase fraction manipulation
Source: Royal Society of Chemistry journal article supplement (doi:10.1039/d4qi02642j), 2024-12-20
Supplement: d4qi02642j1.pdf [file d4qi02642j1.pdf]

# Ultrahigh Energy Storage Density in Lead-Free $\text{Bi}_{0.5}\text{Na}_{0.5}\text{TiO}_3$ -Based Relaxor Ferroelectric Ceramics under Moderate Electric Fields by Manipulating Phase Fraction

Jiangtao Fan<sup>1,3&</sup>, Linxiang Wang<sup>1&</sup>, Jiaxing Wang<sup>3</sup>, Zheng Chen<sup>1</sup>, Langxiang Zhong<sup>1\*</sup>, Tiantian Yang<sup>2\*</sup>,

Zhanggui Hu<sup>1,3\*</sup>

1. College of Material Science and Engineering, Hefei University of Technology, Hefei, 230009, China
2. School of Environmental and Chemical Engineering, Shenyang University of Technology, Shenyang 110870, China
3. Tianjin Key Laboratory of Functional Crystal Materials, Institute of Functional Crystal, College of Material Science and Engineering, Tianjin University of Technology, Tianjin, 300384, China

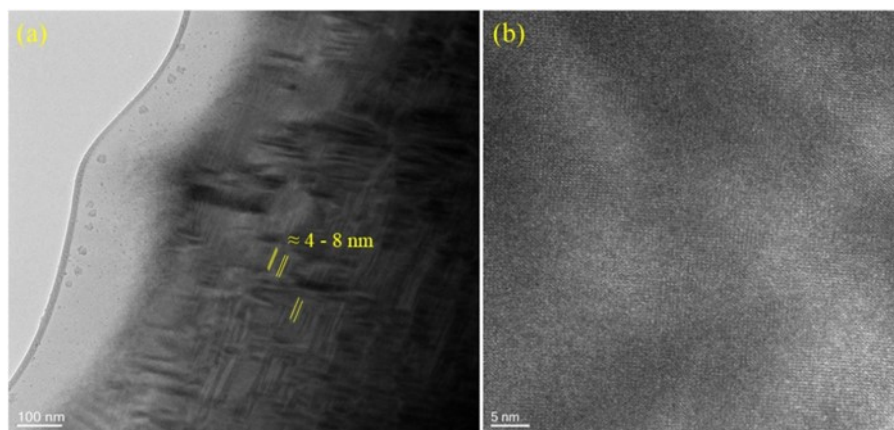

**Fig.S1** (a-b) TEM images pattern for 0.15CTA.
